# Supplementary material
Source: MDPI journal article supplement (https://www.mdpi.com/1099-4300/19/1/5)
Supplement: s1 [file s1]

# Supplementary Materials: Information Decomposition in Multivariate Systems: Definitions, Implementation and Application to Cardiovascular Networks

Luca Faes, Alberto Porta, Giandomenico Nollo and Michal Javorka

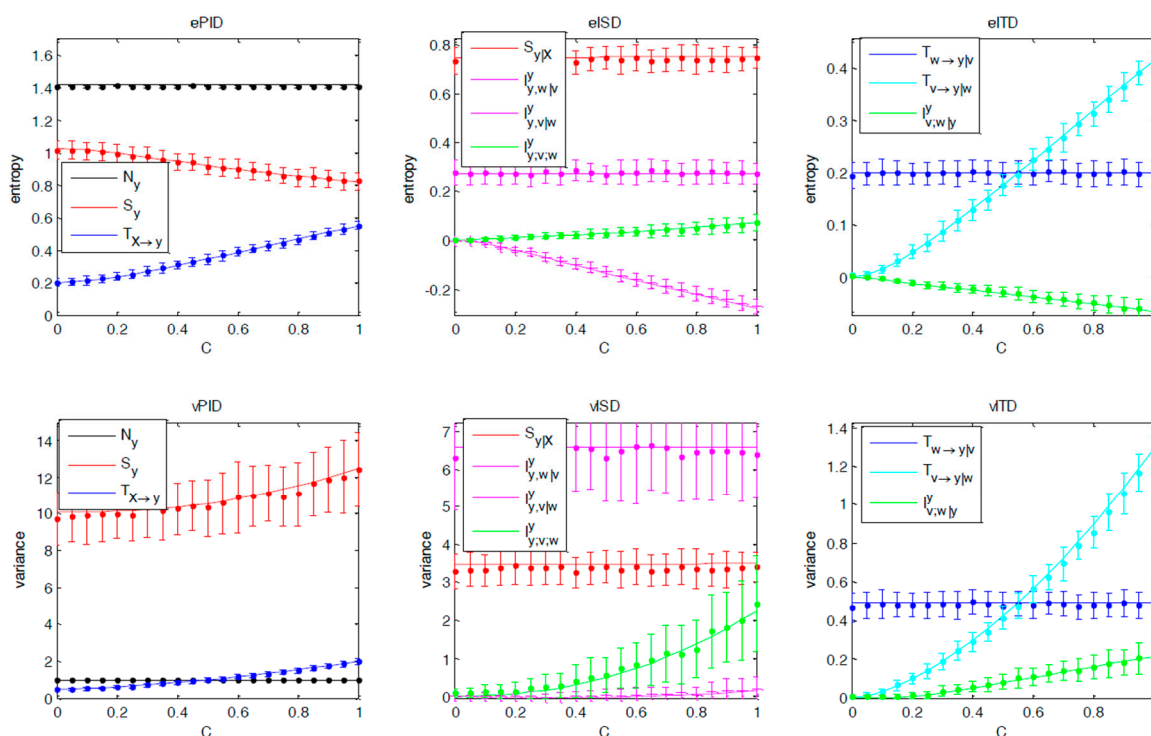

**Figure S1.** Estimation of information measures for finite length realizations of simulated cardiovascular and cardiorespiratory dynamics. The figure reproduces the theoretical values (solid lines) of information measures resulting from predictive information decomposition (PID), information storage decomposition (ISD) and information transfer decomposition (ITD), computed using entropy formulations (upper panels) and variance formulations (lower panels) as a function of the parameter  $c$  for the Type-II simulation (see Figure 4c,d,g,h,k,l of the main document), overlapped with the estimated values of the measures expressed as mean ± std. dev. over 100 realizations of the simulation, each lasting 300 points.
